# Supplementary material for: Intermolecular interactions of tetrabenzoporphyrin- and phthalocyanine-based charge-transfer complexes
Source: Royal Society of Chemistry journal article supplement (doi:10.1039/c9dt03653a), 2019-01-01
Supplement: c9dt03653a1.pdf [file c9dt03653a1.pdf]

## **Intermolecular interaction of tetrabenzoporphyrin- and phthalocyanine-based charge-transfer complexes**

Miki Nishi,<sup>a</sup> Yuki Hayata,<sup>a</sup> Norihisa Hoshino,<sup>b</sup> Noriaki Hanasaki,<sup>c</sup> Tomoyuki Akutagawa,<sup>b</sup> and Masaki Matsuda<sup>a\*</sup>

<sup>a</sup>. *Department of Chemistry, Kumamoto University, 2-39-1 Kurokami, Chuo-ku, Kumamoto 860-8555, Japan. E-mail:*

*masaki@kumamoto-u.ac.jp*

<sup>b</sup>. *Institute of Multidisciplinary Research for Advanced Materials, Tohoku University, 2-1-1 Katahira, Aoba-ku, Sendai 980-8577, Japan.*

<sup>c</sup>. *Department of Physics, Osaka University, 1-1 Machikaneyama, Toyonaka, Osaka 560-0043, Japan.*

### **Contents**

**Figure S1. Photographs of crystals obtained.**

**2**

(a)

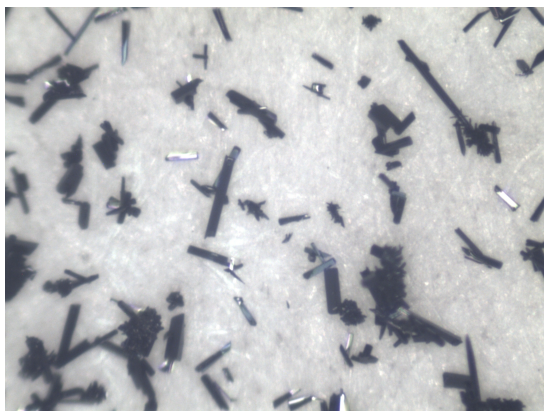

(b)

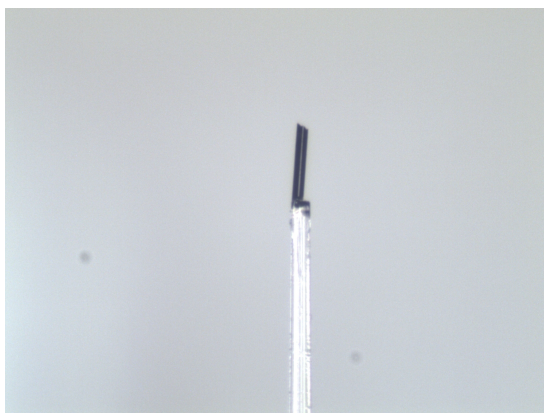

(c)

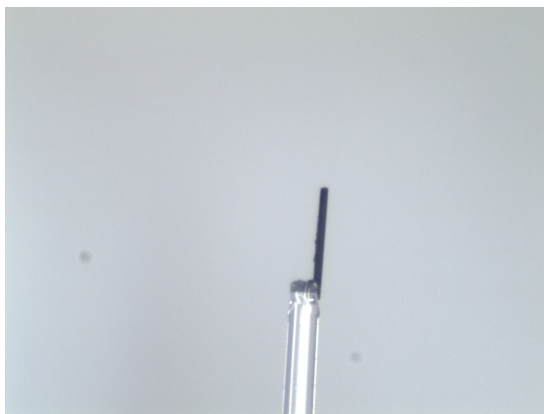

**Fig. S1.** Photographs of harvested crystals of TPP[Fe<sup>III</sup>(tbp)Cl<sub>2</sub>]<sub>2</sub> (a), and a crystal of TPP[Co<sup>III</sup>(tbp)Cl<sub>2</sub>]<sub>2</sub> (b) and TPP[Co<sup>III</sup>(tbp)Br<sub>2</sub>]<sub>2</sub> (c) used for the x-ray crystal structure analysis.
